# Supplementary material
Source: MDPI journal article supplement (https://www.mdpi.com/2221-3759/11/2/24)
Supplement: s1 [file s1]

## Supplementary Materials

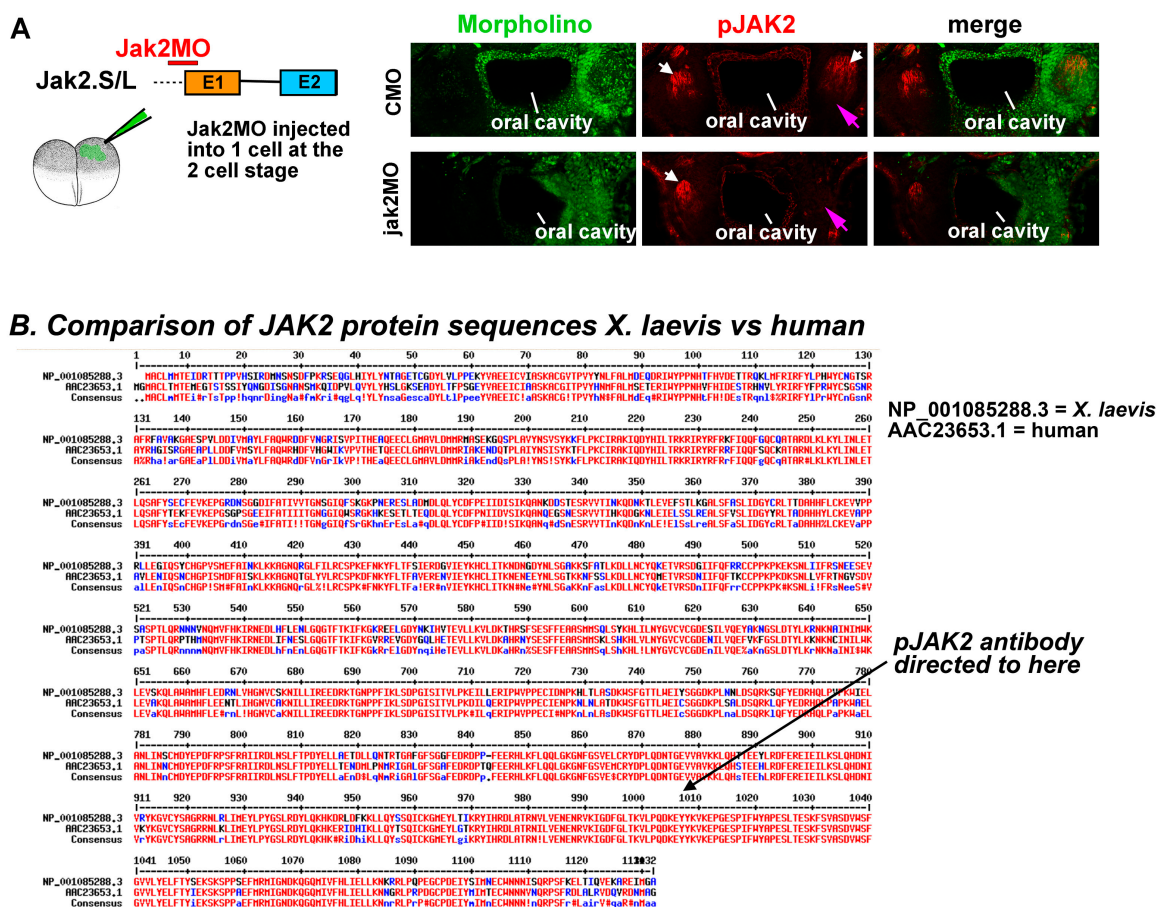

**Figure S1.** Jak2 protein sequence and validation of the morpholino.

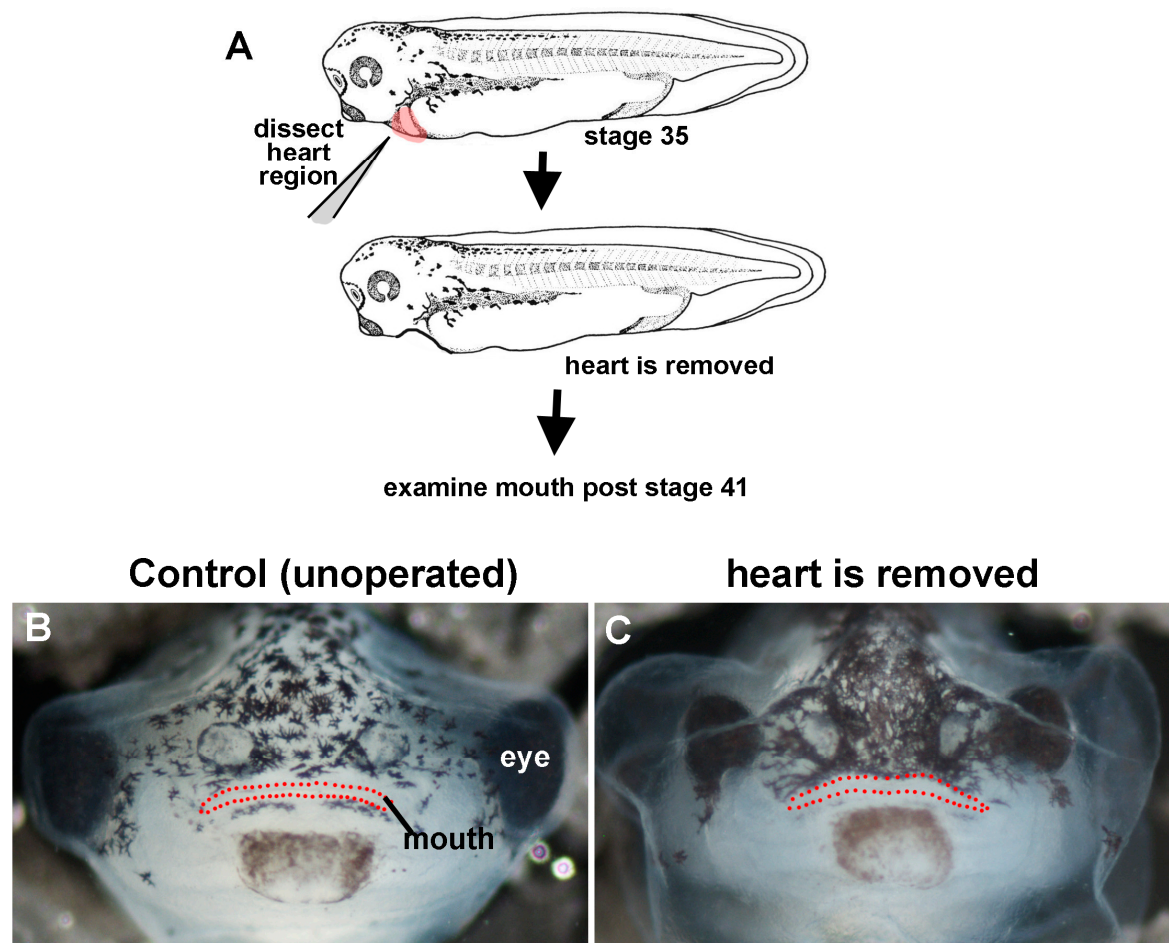

**Figure S2.** Removing the heart has no effect on buccopharyngeal membrane rupture and Cytochalasin D treatment has no effect on muscle development.

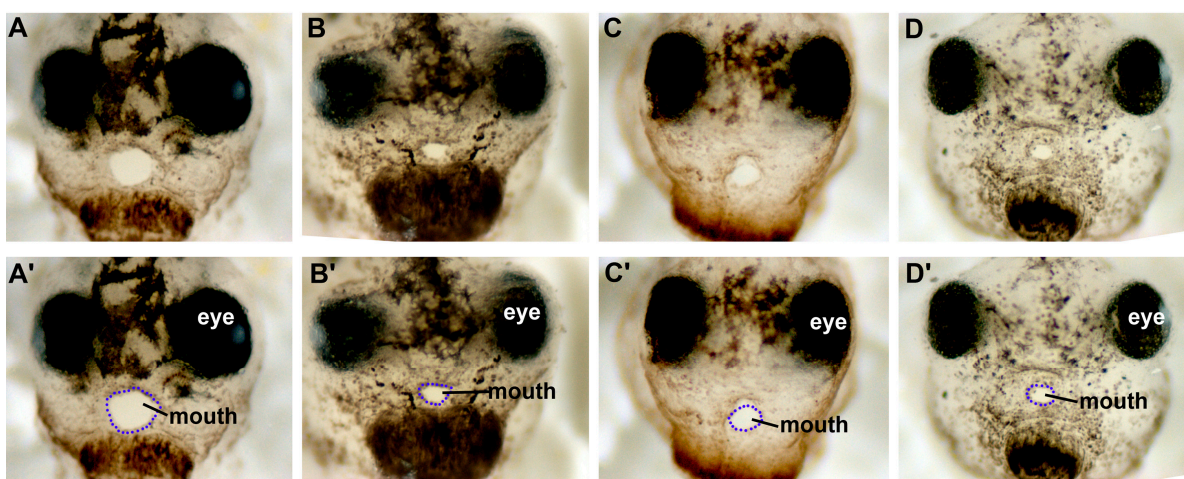

**Figure S3.** Face shape and size does not correlate with buccopharyngeal membrane perforation.

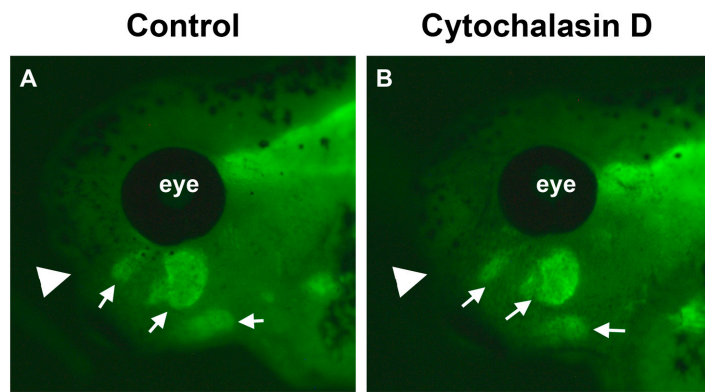

**Figure S4.** Cytochalasin D treatment does not overtly affect muscle development.
